# Supplementary material for: Manganese-phosphomolybdate molecular catalysts for the electron transfer reaction of ferricyanide to ferrocyanide
Source: Royal Society of Chemistry journal article supplement (doi:10.1039/c5ra06018d), 2015-01-01
Supplement: c5ra06018d1.pdf [file c5ra06018d1.pdf]

Supporting Information

## Manganese-Phosphomolybdate Molecular Catalyst for Electron Transfer Reaction of Ferricyanide to Ferrocyanide

Kaining Gong, Yunping Liu, and Zhangang Han\*

<sup>a</sup> College of Chemistry and Material Science, Hebei Normal University, Shijiazhuang, 050024, China. E-mail: [hanzg116@126.com](mailto:hanzg116@126.com)

**Table S1** Crystal data and structure refinement details for the hybrids **1-3**.

| hybrid                                                | <b>1</b>                                                                                                                            | <b>2</b>                                                                                                                       | <b>3</b>                                                                                                                       |
|-------------------------------------------------------|-------------------------------------------------------------------------------------------------------------------------------------|--------------------------------------------------------------------------------------------------------------------------------|--------------------------------------------------------------------------------------------------------------------------------|
| Empirical formula                                     | C <sub>143</sub> H <sub>264</sub> Mn <sub>4</sub> Mo <sub>48</sub> N <sub>22</sub> Na <sub>6</sub> O <sub>262</sub> P <sub>32</sub> | C <sub>26</sub> H <sub>62</sub> Mn <sub>2</sub> Mo <sub>12</sub> N <sub>4</sub> Na <sub>4</sub> O <sub>71</sub> P <sub>8</sub> | C <sub>52</sub> H <sub>92</sub> Mn <sub>3</sub> Mo <sub>12</sub> N <sub>8</sub> Na <sub>3</sub> O <sub>75</sub> P <sub>9</sub> |
| Formula weight                                        | 12436.92                                                                                                                            | 3167.60                                                                                                                        | 3692.96                                                                                                                        |
| Crystal system                                        | Monoclinic                                                                                                                          | Monoclinic                                                                                                                     | Orthorhombic                                                                                                                   |
| Space group                                           | <i>P2(1)/c</i>                                                                                                                      | <i>C2/c</i>                                                                                                                    | <i>Pnma</i>                                                                                                                    |
| <i>a</i> (Å)                                          | 23.0522(11)                                                                                                                         | 21.1291(11)                                                                                                                    | 29.508(19)                                                                                                                     |
| <i>b</i> (Å)                                          | 15.7570(7)                                                                                                                          | 18.4006(9)                                                                                                                     | 23.454(15)                                                                                                                     |
| <i>c</i> (Å)                                          | 23.8647(11)                                                                                                                         | 21.8843(11)                                                                                                                    | 15.429(10)                                                                                                                     |
| $\alpha, \beta, \gamma$ (°)                           | 90, 90.9170(10), 90                                                                                                                 | 90, 100.7960(10), 90                                                                                                           | 90, 90, 90                                                                                                                     |
| Volume (Å <sup>3</sup> ), <i>Z</i>                    | 8667.3(7), 2                                                                                                                        | 8357.8(7), 4                                                                                                                   | 10678(12), 4                                                                                                                   |
| Density(calculated)(Mg·m <sup>-3</sup> )              | 2.373                                                                                                                               | 2.509                                                                                                                          | 2.284                                                                                                                          |
| Absorption coefficient (mm <sup>-1</sup> )            | 2.084                                                                                                                               | 2.321                                                                                                                          | 1.961                                                                                                                          |
| <i>F</i> (000)                                        | 5984                                                                                                                                | 6088                                                                                                                           | 7140                                                                                                                           |
| Crystal size (mm <sup>3</sup> )                       | 0.21 × 0.19 × 0.15                                                                                                                  | 0.17 × 0.15 × 0.13                                                                                                             | 0.19 × 0.15 × 0.13                                                                                                             |
| $\theta$ (°)                                          | 1.77 - 25.01                                                                                                                        | 1.65 - 25.01                                                                                                                   | 1.91 - 25.01                                                                                                                   |
| Reflections collected                                 | 41517                                                                                                                               | 20341                                                                                                                          | 50207                                                                                                                          |
| Independent reflections ( <i>R</i> <sub>(int)</sub> ) | 15263 [ <i>R</i> <sub>(int)</sub> = 0.0288]                                                                                         | 7362 [ <i>R</i> <sub>(int)</sub> = 0.0173]                                                                                     | 9661 [ <i>R</i> <sub>(int)</sub> = 0.0248]                                                                                     |
| Max. and min. Transmission                            | 0.732 and 0.652                                                                                                                     | 0.740 and 0.681                                                                                                                | 0.775 and 0.710                                                                                                                |
| Data/restraints/parameters                            | 15263 / 1308 / 1222                                                                                                                 | 7362 / 43 / 649                                                                                                                | 9661 / 66 / 766                                                                                                                |
| Goodness-of-fit on <i>F</i> <sup>2</sup>              | 1.067                                                                                                                               | 1.000                                                                                                                          | 1.061                                                                                                                          |
| Final <i>R</i> indices [ <i>I</i> > 2σ( <i>I</i> )]   | <i>R</i> <sub>1</sub> = 0.0472, <i>wR</i> <sub>2</sub> = 0.1193                                                                     | <i>R</i> <sub>1</sub> = 0.0293, <i>wR</i> <sub>2</sub> = 0.0878                                                                | <i>R</i> <sub>1</sub> = 0.0338, <i>wR</i> <sub>2</sub> = 0.1015                                                                |
| <i>R</i> indices (all data)                           | <i>R</i> <sub>1</sub> = 0.0590, <i>wR</i> <sub>2</sub> = 0.1299                                                                     | <i>R</i> <sub>1</sub> = 0.0311, <i>wR</i> <sub>2</sub> = 0.0893                                                                | <i>R</i> <sub>1</sub> = 0.0373, <i>wR</i> <sub>2</sub> = 0.1050                                                                |

<sup>a</sup>  $R_1 = \sum ||F_o| - |F_c|| / \sum |F_o|$ ; <sup>b</sup>  $wR_2 = \sum [w(F^2_o - F^2_c)^2] / \sum [w(F^2_o)^2]^{1/2}$

**Table S2.** BVS calculations of Mo centers in hybrids **1-3**

|     | Hybrid <b>1</b> | Hybrid <b>2</b> | Hybrid <b>3</b> |
|-----|-----------------|-----------------|-----------------|
| Mo1 | 5.227           | 5.193           | 5.140           |
| Mo2 | 5.252           | 5.260           | 5.158           |
| Mo3 | 5.207           | 5.210           | 5.152           |
| Mo4 | 5.301           | 5.228           | 5.190           |
| Mo5 | 5.206           | 5.256           | 5.166           |
| Mo6 | 5.233           | 5.289           | 5.165           |

**Table S3.** BVS calculations of P centers in compounds **1-3**

|    | Hybrid <b>1</b> | Hybrid <b>2</b> | Hybrid <b>3</b> |
|----|-----------------|-----------------|-----------------|
| P1 | 4.798           | 4.801           | 4.862           |
| P2 | 4.925           | 4.862           | 4.801           |
| P3 | 4.828           | 4.803           | 4.482           |
| P4 | 4.808           | 4.851           | 4.809           |

**Table S4.** BVS calculations of Mn centers in compounds **1-3**

|     | Hybrid <b>1</b> | Hybrid <b>2</b> | Hybrid <b>3</b> |
|-----|-----------------|-----------------|-----------------|
| Mn1 | 1.989           | 2.157           | 2.012           |
| Mn2 | 1.960           | 1.989           | 1.962           |

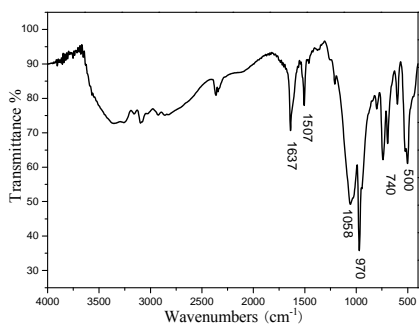

Fig. S1 IR spectra of (a) hybrid 1

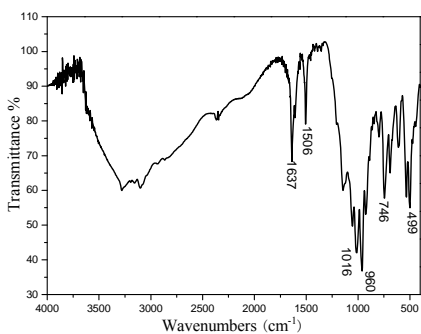

(b) hybrid 2

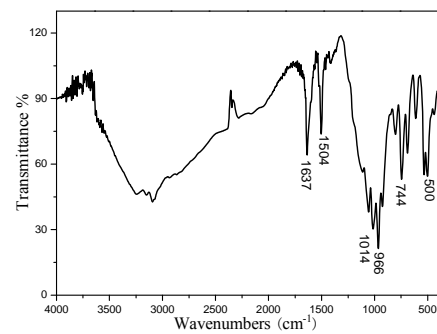

(c) hybrid 3

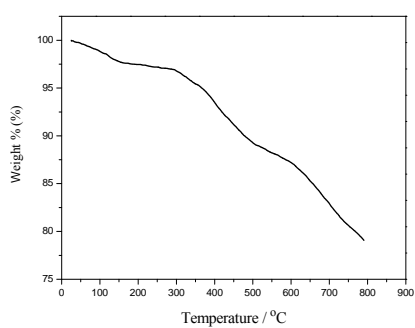

Fig. S2 TG curves of (a) of hybrid 1

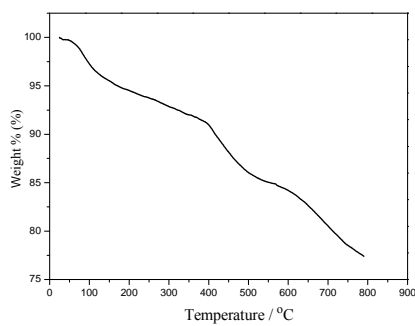

(b) TG of hybrid 2

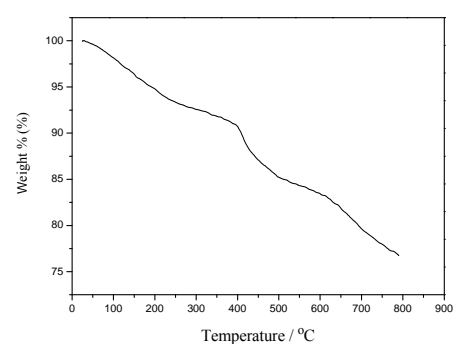

(c) TG of hybrid 3

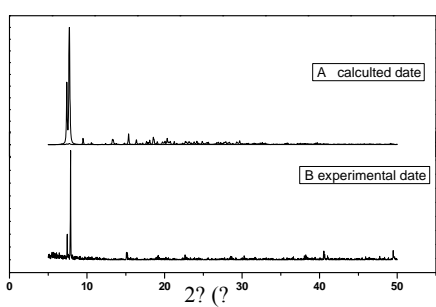

Fig. S3 XRD curves of (a) of hybrid 1

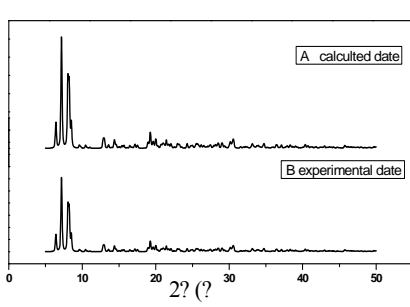

(b) XRD of hybrid 2

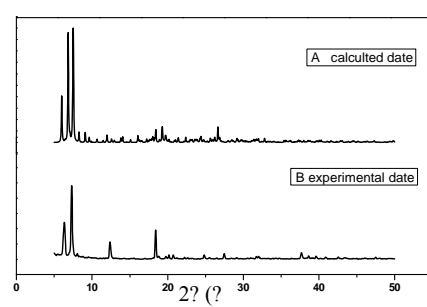

(c) XRD of hybrid 3

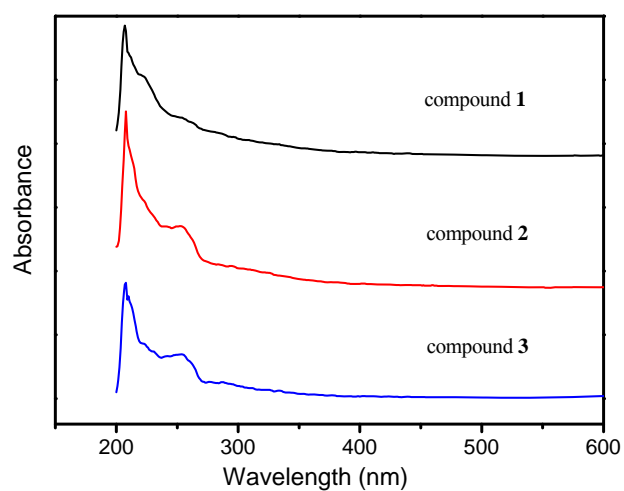

Fig. S4 UV of hybrids **1-3** in methanol

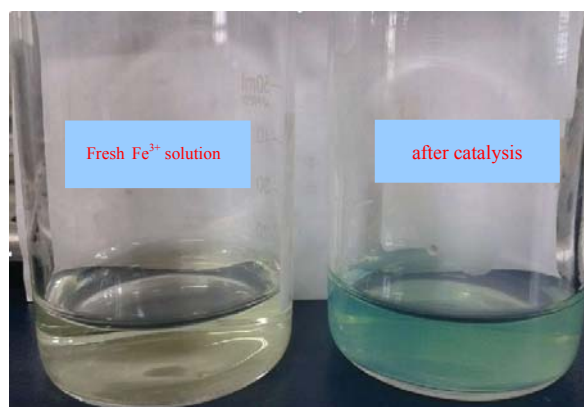

Fig. S5 The colors of solutions of  $\text{Fe}^{3+}$  to  $\text{Fe}^{2+}$  with the presence of **1**

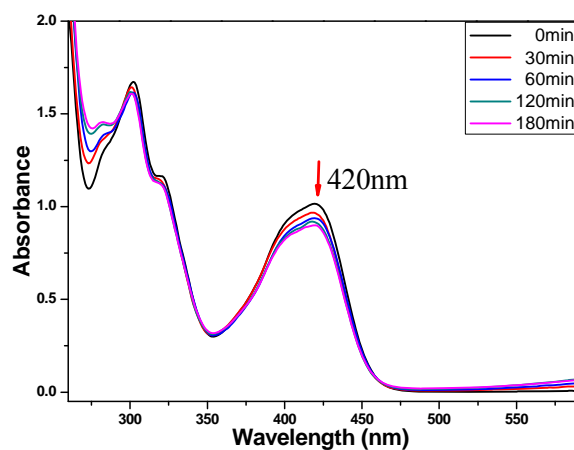

Fig. S6 Successive UV-visible absorption spectra for aqueous solutions of the catalytic reduction reactions of  $[\text{Fe}(\text{CN})_6]^{3-}$  and  $\text{S}_2\text{O}_3^{2-}$  in the presence of  $(\text{H}_2\text{bpp})_3[\text{PMo}^{\text{VI}}_9\text{Mo}^{\text{V}}_3\text{O}_{40}]$

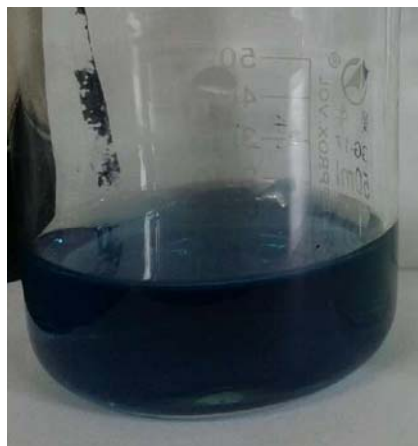

Fig. S7 The solution color of  $\text{Fe}^{3+}$  with  $\text{Na}_2\text{S}_2\text{O}_3$  as reductant with the presence of  $\text{H}_3\text{PMo}_{12}\text{O}_{40}$

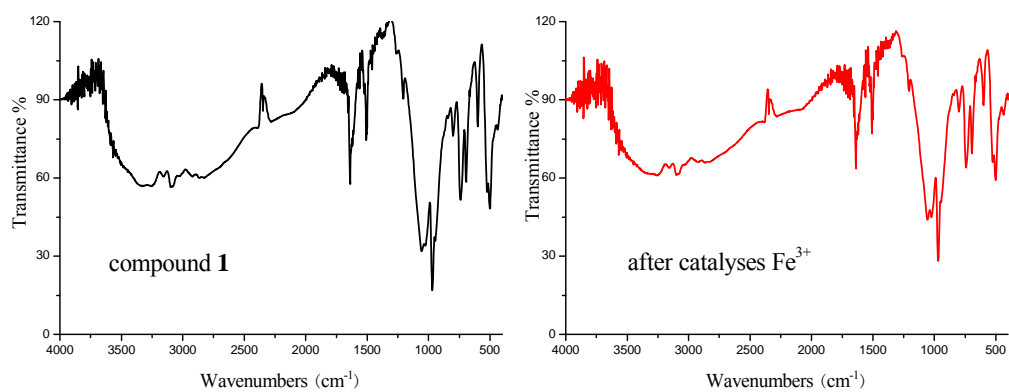

Fig. S8 Comparisons of IR spectra of the hybrid **1**, and after catalysis

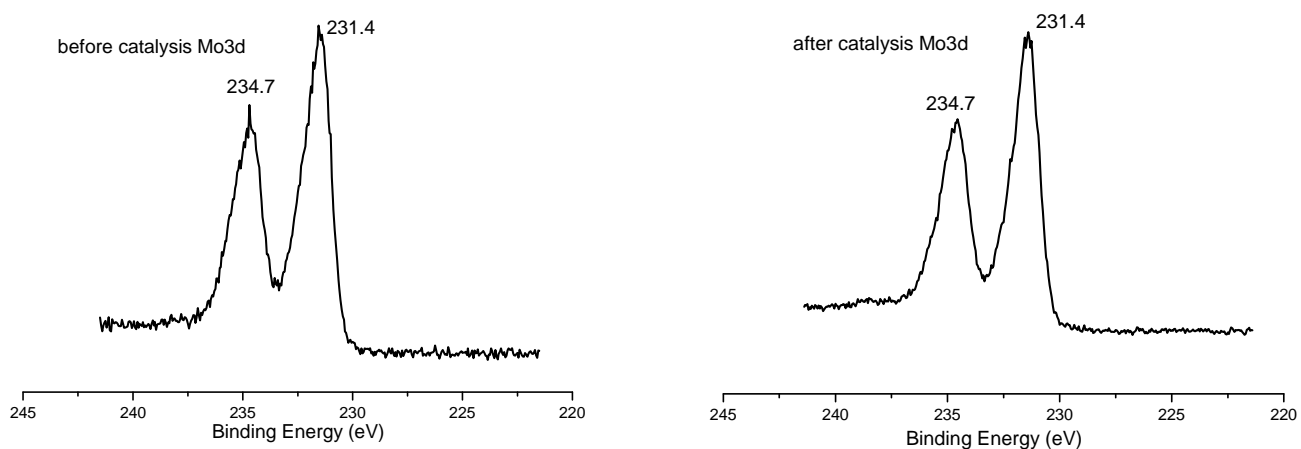

Fig. S9 XPS for Mo of hybrid **1** before catalysis and after catalysis.
